# Supplementary material for: Photoluminescence modification of europium(iii)-doped MAl2O4 (M = Zn, Mg) spinels induced by Ag@SiO2 core–shell nanoparticles
Source: Royal Society of Chemistry journal article supplement (doi:10.1039/d4nr01526f), 2024-01-01
Supplement: d4nr01526f1.pdf [file d4nr01526f1.pdf]

SUPPLEMENTARY INFORMATION

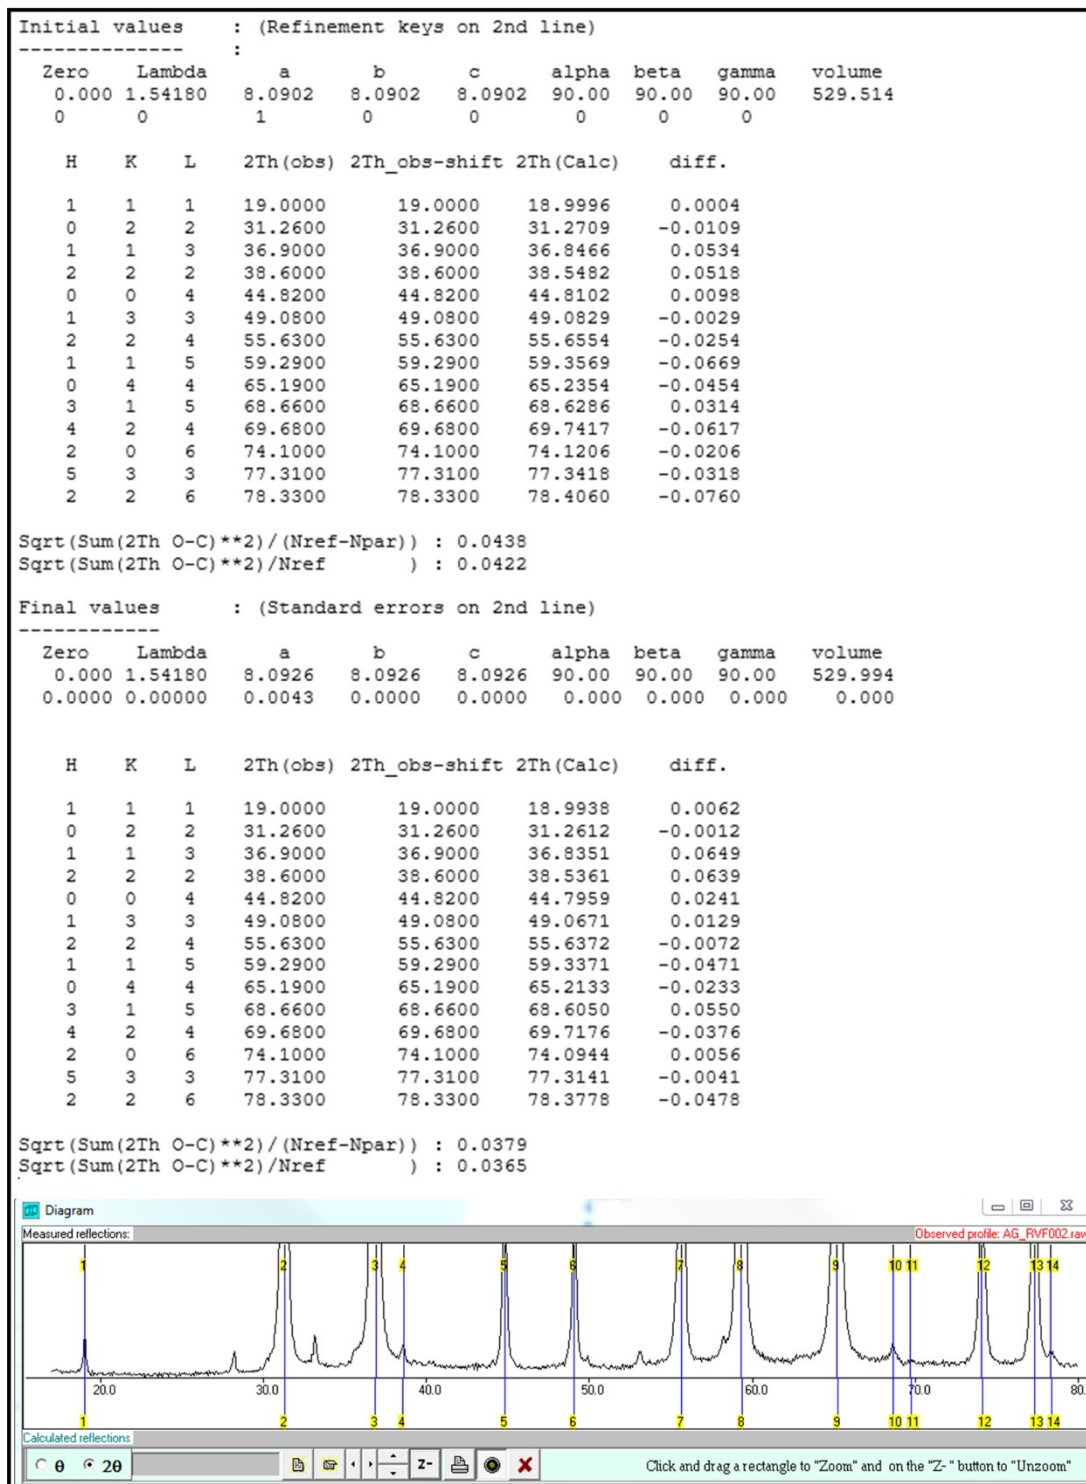

Figure S1: The full cell parameters obtained from the indexed patterns for ZnAl<sub>2</sub>O<sub>4</sub>.

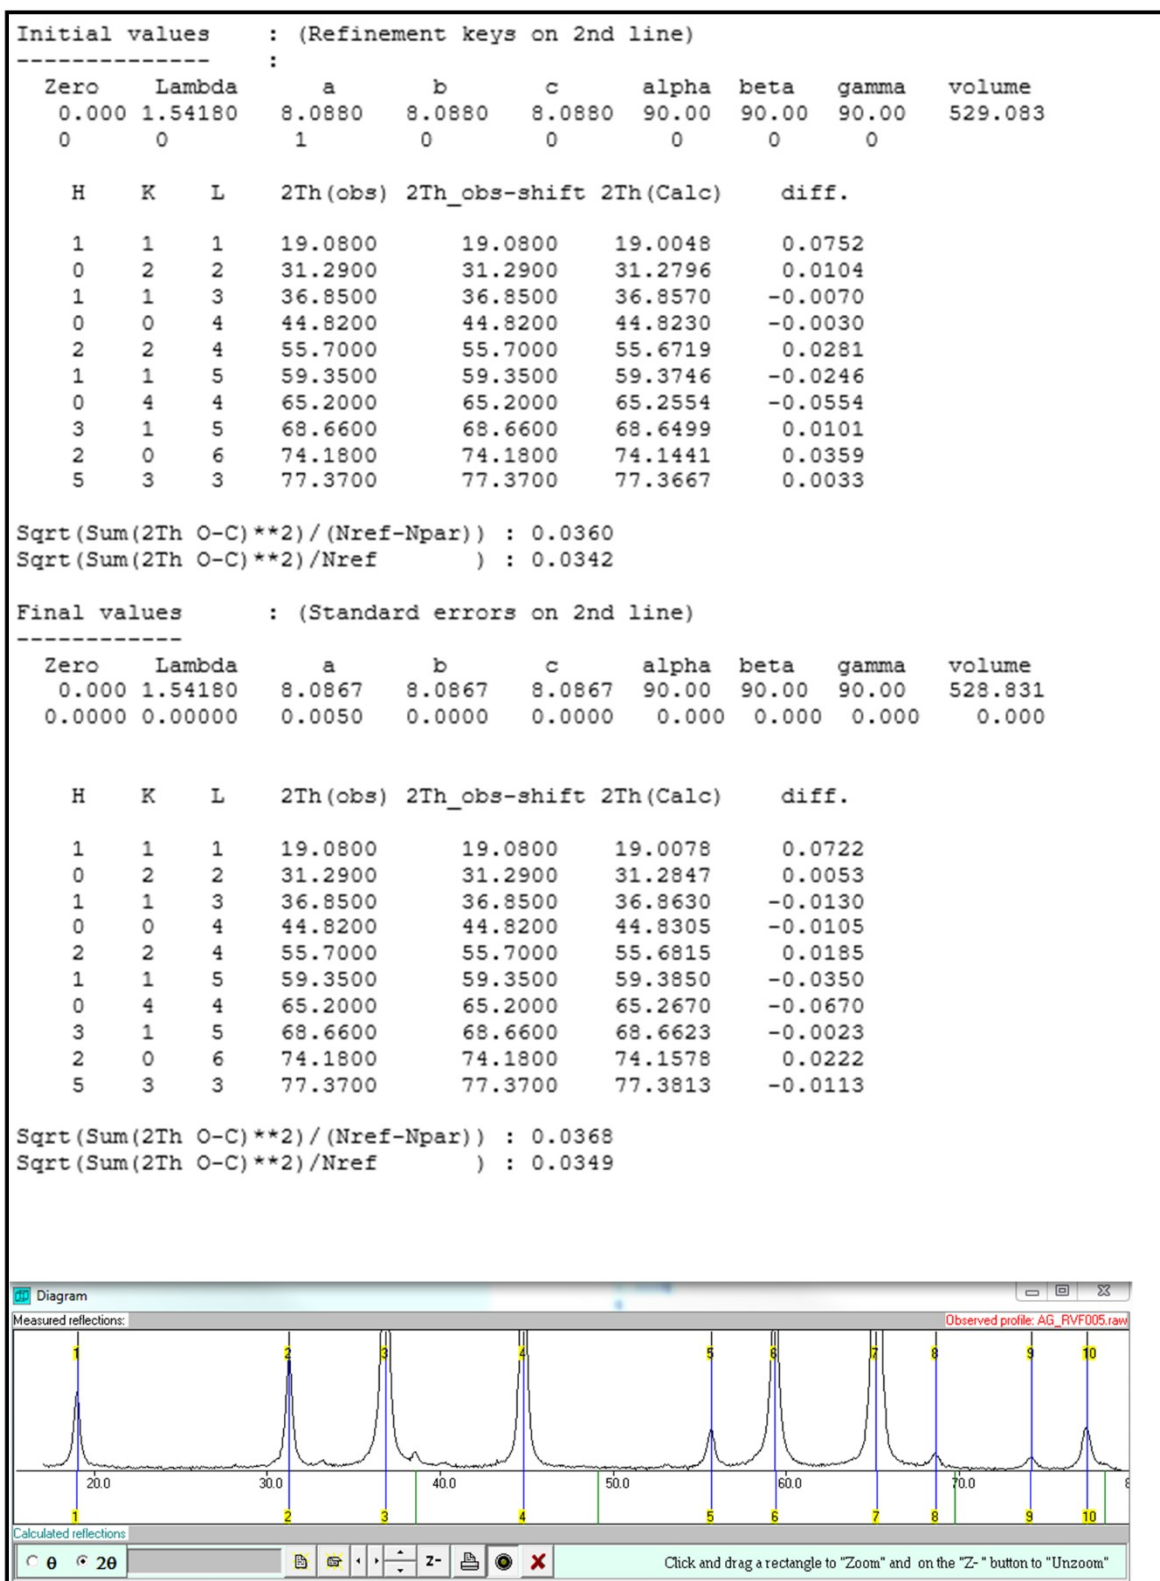

Figure S2: The full cell parameters obtained from the indexed patterns for  $\text{ZnAl}_2\text{O}_4:\text{Eu}^{3+}$ .

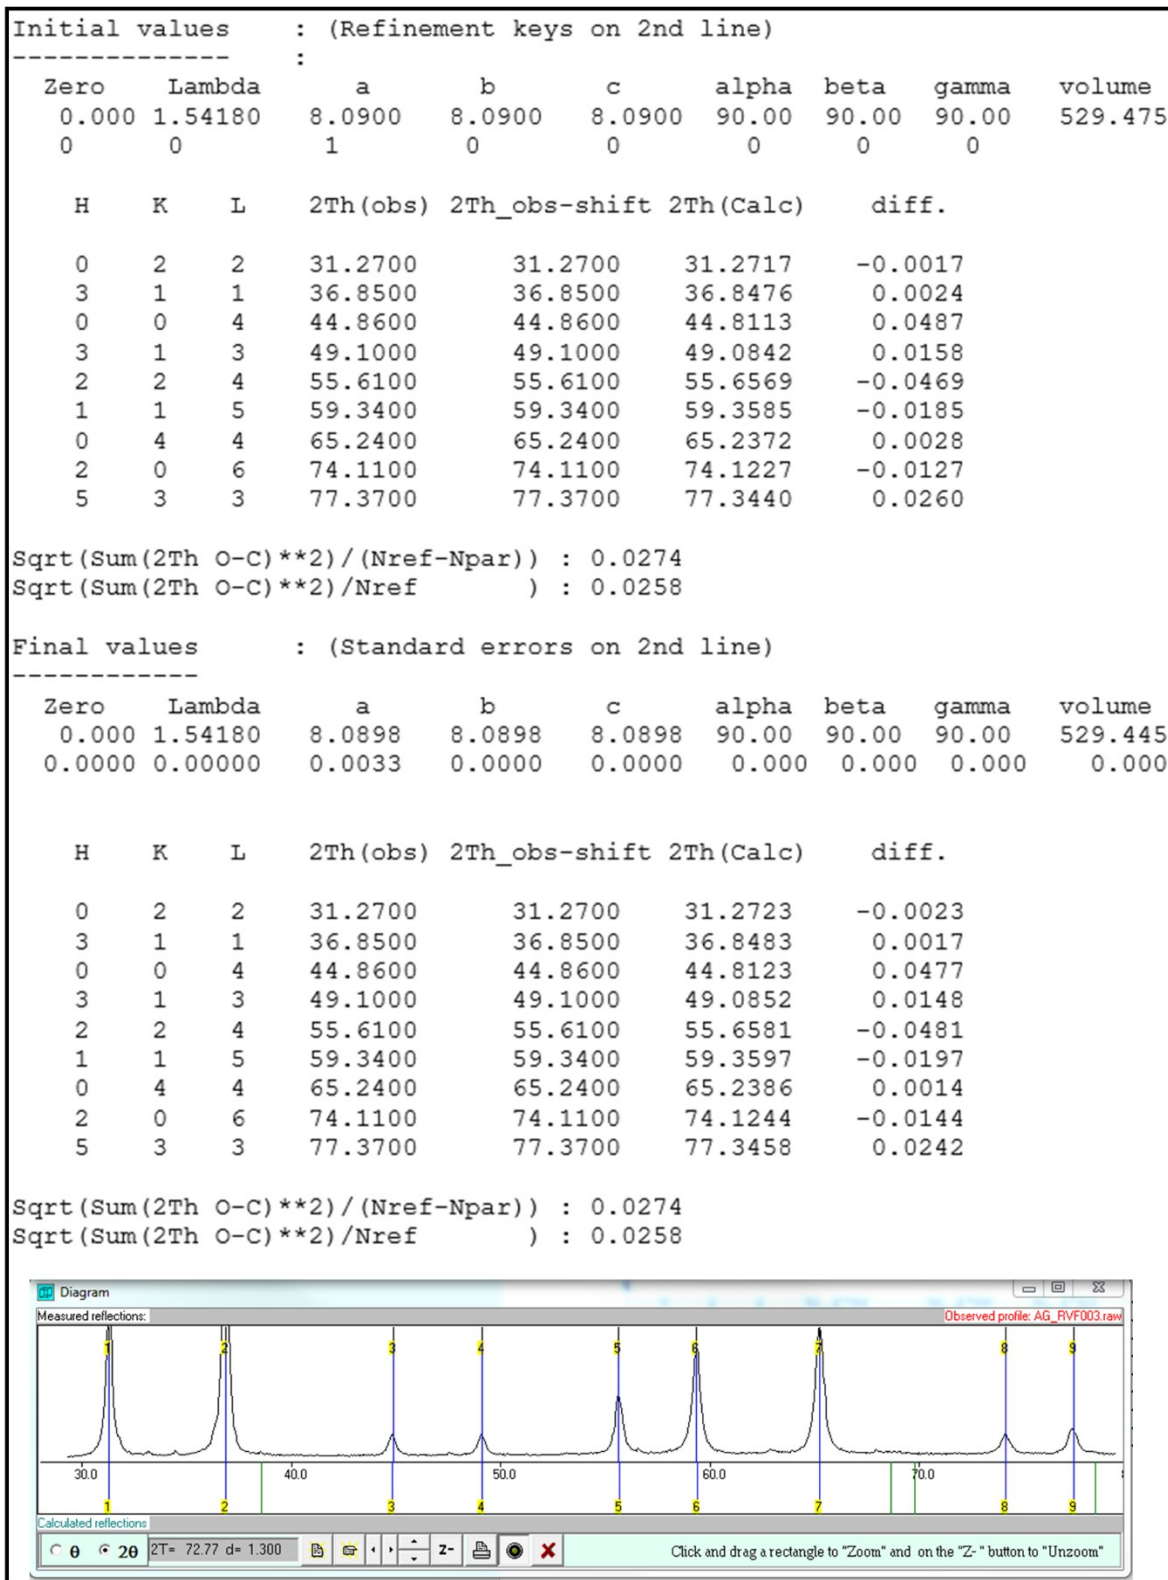

Figure S3: The full cell parameters obtained from the indexed patterns for  $MgAl_2O_4$ .

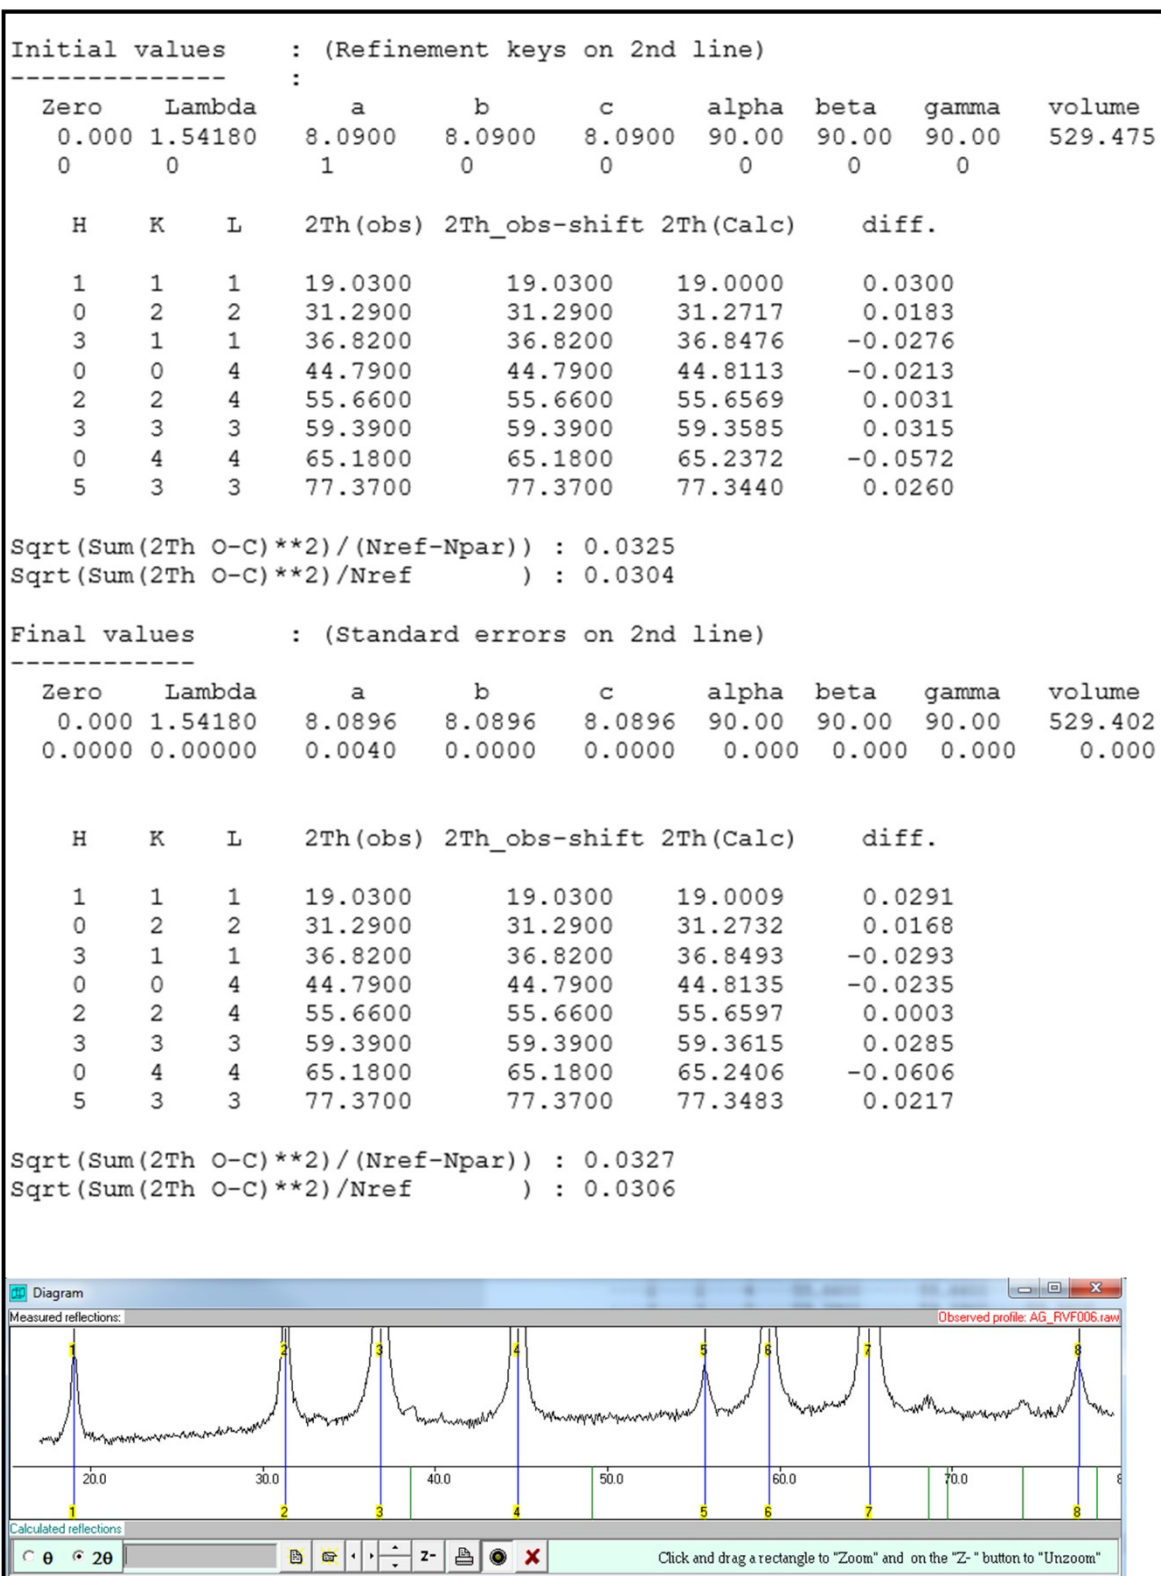

**Figure S4:** The full cell parameters obtained from the indexed patterns for  $\text{MgAl}_2\text{O}_4:\text{Eu}^{3+}$ .

**Table S1:** Data fits of emission and excitation spectra of ZAOE and MAOE

| <b>ZAOE</b>                           |                          |                                   |                                        |                        |                                       |                          |                                   |                                        |                        |
|---------------------------------------|--------------------------|-----------------------------------|----------------------------------------|------------------------|---------------------------------------|--------------------------|-----------------------------------|----------------------------------------|------------------------|
| <b>Emission</b>                       |                          |                                   |                                        |                        | <b>Excitation</b>                     |                          |                                   |                                        |                        |
| <b>Position<br/>(cm<sup>-1</sup>)</b> | <b>Position<br/>(nm)</b> | <b>FWHM<br/>(cm<sup>-1</sup>)</b> | <b>Intensity<br/>(cm<sup>-1</sup>)</b> | <b>Energy<br/>(eV)</b> | <b>Position<br/>(cm<sup>-1</sup>)</b> | <b>Position<br/>(nm)</b> | <b>FWHM<br/>(cm<sup>-1</sup>)</b> | <b>Intensity<br/>(cm<sup>-1</sup>)</b> | <b>Energy<br/>(eV)</b> |
| 14178.7                               | 705                      | 211.8                             | 0.683                                  | 1.758                  | 18901.4                               | 529                      | 706,0                             | 0.172                                  | 2.343                  |
| 14398.0                               | 695                      | 339.5                             | 0.727                                  | 1.785                  | 21582.9                               | 463                      | 701,6                             | 0.657                                  | 2.676                  |
| 15340.8                               | 652                      | 550.7                             | 0.658                                  | 1.902                  | 23701.6                               | 422                      | 679,4                             | 1.370                                  | 2.939                  |
| 16156.6                               | 619                      | 425.2                             | 7.160                                  | 2.003                  | 25328.5                               | 395                      | 937,1                             | 1.460                                  | 3.140                  |
| 16664.7                               | 600                      | 146.2                             | 0.277                                  | 2.066                  | 26243.7                               | 381                      | 748,5                             | 0.299                                  | 3.254                  |
| 16881.4                               | 592                      | 302.9                             | 0.859                                  | 2.093                  | 35392.7                               | 283                      | 6959                              | 41.48                                  | 4.388                  |
| 17237.0                               | 580                      | 309.7                             | 0.439                                  | 2.137                  |                                       |                          |                                   |                                        |                        |

  

| <b>MAOE</b>                           |                          |                                   |                                        |                        |                                       |                          |                                   |                                        |                        |
|---------------------------------------|--------------------------|-----------------------------------|----------------------------------------|------------------------|---------------------------------------|--------------------------|-----------------------------------|----------------------------------------|------------------------|
| <b>Emission</b>                       |                          |                                   |                                        |                        | <b>Excitation</b>                     |                          |                                   |                                        |                        |
| <b>Position<br/>(cm<sup>-1</sup>)</b> | <b>Position<br/>(nm)</b> | <b>FWHM<br/>(cm<sup>-1</sup>)</b> | <b>Intensity<br/>(cm<sup>-1</sup>)</b> | <b>Energy<br/>(eV)</b> | <b>Position<br/>(cm<sup>-1</sup>)</b> | <b>Position<br/>(nm)</b> | <b>FWHM<br/>(cm<sup>-1</sup>)</b> | <b>Intensity<br/>(cm<sup>-1</sup>)</b> | <b>Energy<br/>(eV)</b> |
| 14159.9                               | 706                      | 179.2                             | 1.590                                  | 1.756                  | 19262.0                               | 519                      | 823.0                             | 0.293                                  | 2.388                  |
| 14324.8                               | 698                      | 421.2                             | 3.180                                  | 1.776                  | 22087.4                               | 453                      | 730.2                             | 0.863                                  | 2.738                  |
| 15299.0                               | 654                      | 471.2                             | 1.910                                  | 1.897                  | 24278.7                               | 412                      | 698.5                             | 1.310                                  | 3.010                  |
| 16152.8                               | 619                      | 443.9                             | 21.42                                  | 2.003                  | 25998.4                               | 385                      | 916.9                             | 2.200                                  | 3.,223                 |
| 16664.7                               | 600                      | 143.3                             | 0.816                                  | 2.066                  | 26849.7                               | 372                      | 923.8                             | 0.846                                  | 3.329                  |
| 16874.1                               | 593                      | 292.5                             | 2.670                                  | 2.092                  | 36929.9                               | 271                      | 7450                              | 53.79                                  | 4.579                  |
| 17213.8                               | 581                      | 312.8                             | 1.370                                  | 2.134                  |                                       |                          |                                   |                                        |                        |

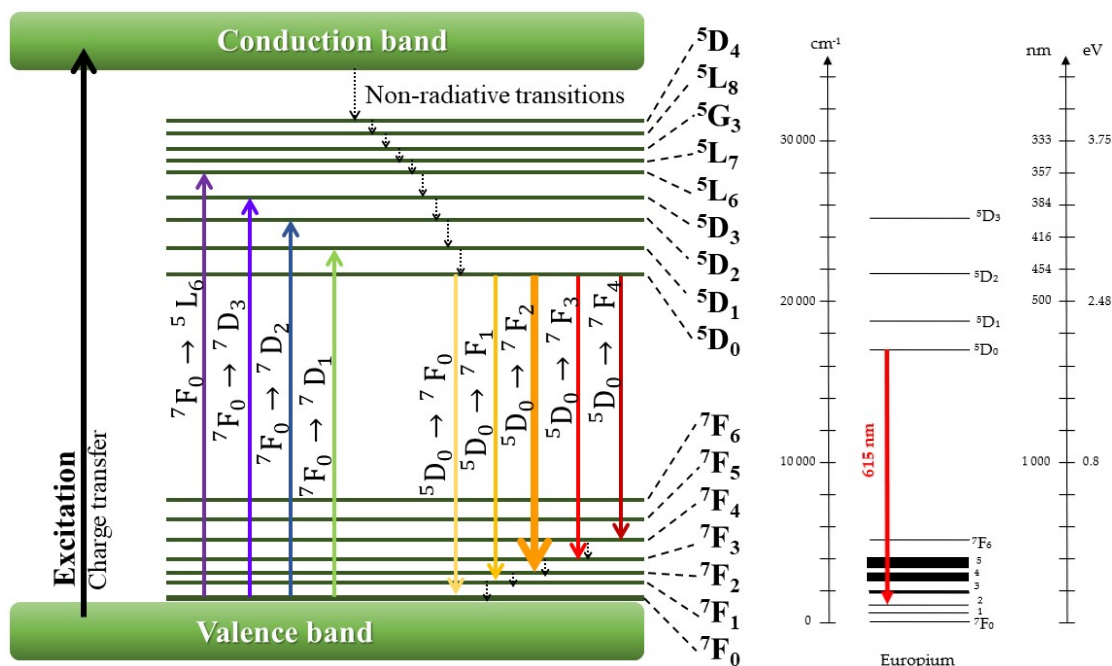

Figure S5: Energy level diagram of Eu<sup>3+</sup>. Based on M. Dimitrievska et. at. [1]

Table S2a: Spectral parameters of EuDS samples

| Sample | Judd-Ofelt Intensity Parameters                 |                                                 | Radiative Transition Probabilities<br><sup>5</sup> D <sub>0</sub> → <sup>7</sup> F <sub>J</sub> (J = 1, 2, 4) |                          |                          |
|--------|-------------------------------------------------|-------------------------------------------------|---------------------------------------------------------------------------------------------------------------|--------------------------|--------------------------|
|        | $\Omega_2$ (10 <sup>-20</sup> cm <sup>2</sup> ) | $\Omega_4$ (10 <sup>-20</sup> cm <sup>2</sup> ) | $A_1$ (s <sup>-1</sup> )                                                                                      | $A_2$ (s <sup>-1</sup> ) | $A_4$ (s <sup>-1</sup> ) |
|        | ZAOE                                            | 8.651                                           | 4.459                                                                                                         | 78.97                    | 434.26                   |
| MAOE   | 8.261                                           | 4.679                                           | 72.20                                                                                                         | 373.86                   | 104.50                   |

Table S2b: Spectral parameters of EuDS samples

| Sample | $\tau_{rad}$ (ms) | Branching Ratio<br><sup>5</sup> D <sub>0</sub> → <sup>7</sup> F <sub>J</sub> (J = 1, 2, 4) |           |           | Stimulated emission<br>cross-section <sup>5</sup> D <sub>0</sub> → <sup>7</sup> F <sub>J</sub> (J = 1, 2, 4) |                                                 |                                                 |
|--------|-------------------|--------------------------------------------------------------------------------------------|-----------|-----------|--------------------------------------------------------------------------------------------------------------|-------------------------------------------------|-------------------------------------------------|
|        |                   | $\beta_1$                                                                                  | $\beta_2$ | $\beta_4$ | $\sigma_1$ (10 <sup>-22</sup> cm <sup>2</sup> )                                                              | $\sigma_2$ (10 <sup>-22</sup> cm <sup>2</sup> ) | $\sigma_4$ (10 <sup>-22</sup> cm <sup>2</sup> ) |
|        |                   | ZAOE                                                                                       | 1.56      | 12.7%     | 69.6%                                                                                                        | 17.8%                                           | 1.12                                            |
| MAOE   | 1.77              | 13.1%                                                                                      | 67.9%     | 19.0%     | 1.11                                                                                                         | 7.04                                            | 3.46                                            |

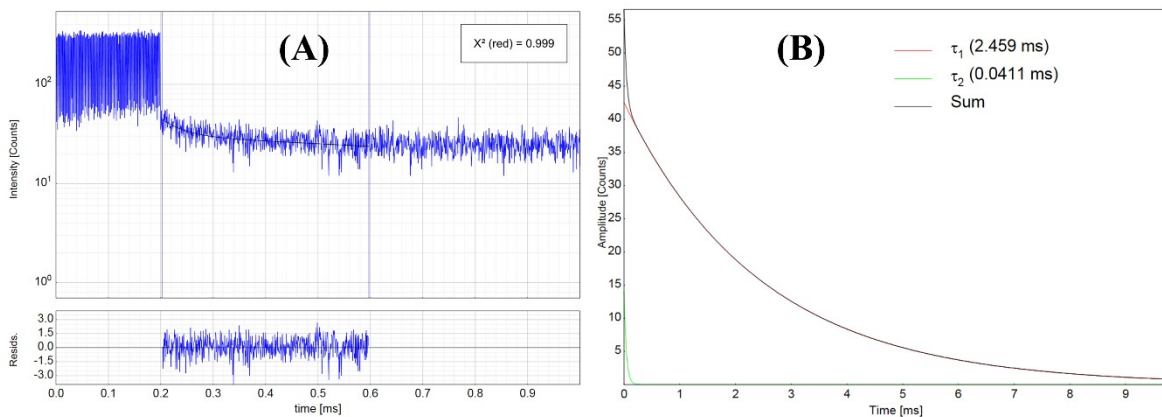

**Figure S6.** ZAOE. (A) *TCSPC* fitting and residual. (B) Fitted decay and exponential components.

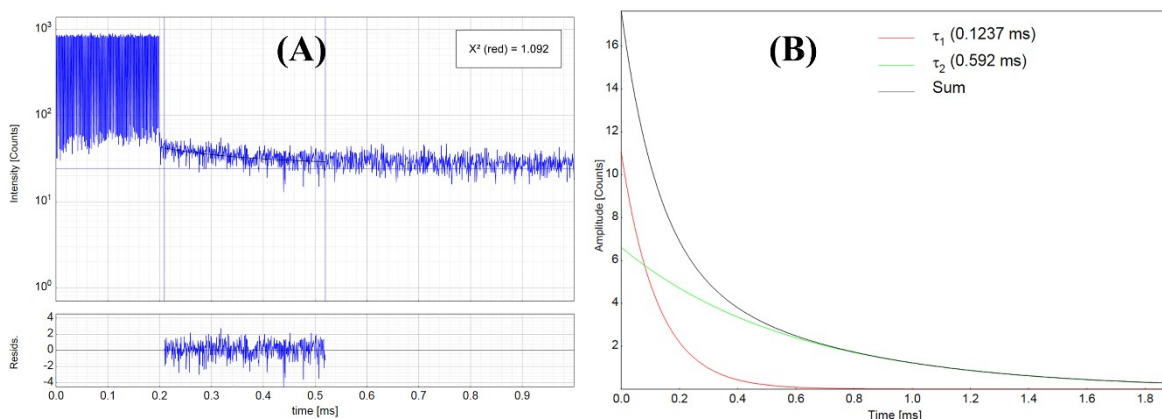

**Figure S7.** ZAOE-AgMPCS. (A) *TCSPC* fitting and residual. (B) Fitted decay and exponential components.

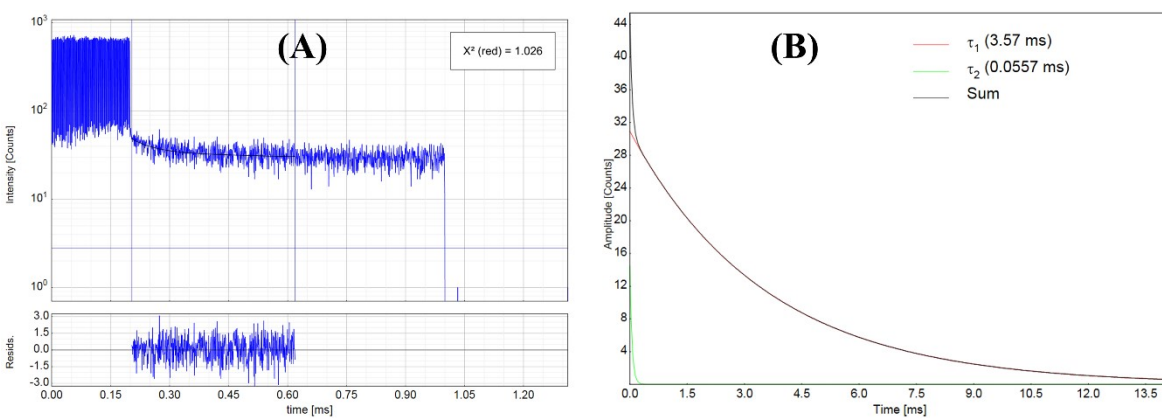

**Figure S8.** MAOE. (A) *TCSPC* fitting and residual. (B) Fitted decay and exponential components.

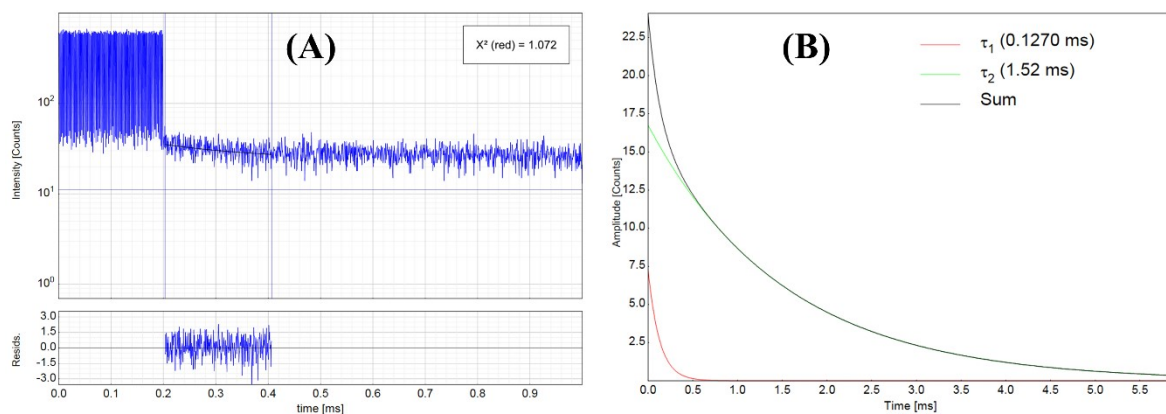

**Figure S9.** MAOE-AgMPCS. (A) *TCSPC* fitting and residual. (B) Fitted decay and exponential components.

## Reference

- [1] M. Dimitrievska, T.B. Ivetić, A.P. Litvinchuk, A. Fairbrother, B.B. Miljević, G.R. Štrbac, A. Pérez Rodríguez, S.R. Lukić-Petrović, *J. Phys. Chem. C* 120 (2016) 18887–18894.
